# Supplementary material for: Pelvic ring injury in the elderly: Fragile patients with substantial mortality rates and long-term physical impairment
Source: PubMed Central journal article supplement (PMC6538139; doi:10.1371/journal.pone.0216809), 2019-05-28
Supplement: pone.0216809.s001.pdf [file pone.0216809.s001.pdf]

# Optimal Performance Physical Therapy

## Short Musculoskeletal Function Assessment

**Name:** \_\_\_\_\_ **Signature:** \_\_\_\_\_ **Date:** \_\_\_\_\_

Instructions: We are interested in finding out how you are managing with your injury or arthritis this week. We would like to know about any problems you may be having with your daily activities because of your injury or arthritis. Please answer each question by putting a check in the box corresponding to the choice that best describes you.

**These questions are about how much difficulty you may be having this week with your daily activities because of your injury or arthritis.**

|                                                                                                                                                   | Not at all<br>Difficult<br>A | A Little<br>Difficult<br>B | Moderately<br>Difficult<br>C | Very<br>Difficult<br>D   | Unable<br>to do<br>E     |
|---------------------------------------------------------------------------------------------------------------------------------------------------|------------------------------|----------------------------|------------------------------|--------------------------|--------------------------|
| 1. How difficult is it for you to get in or out of a low chair?                                                                                   | <input type="checkbox"/>     | <input type="checkbox"/>   | <input type="checkbox"/>     | <input type="checkbox"/> | <input type="checkbox"/> |
| 2. How difficult is it for you to open medicine bottles or jars?                                                                                  | <input type="checkbox"/>     | <input type="checkbox"/>   | <input type="checkbox"/>     | <input type="checkbox"/> | <input type="checkbox"/> |
| 3. How difficult is it for you to shop for groceries or other things?                                                                             | <input type="checkbox"/>     | <input type="checkbox"/>   | <input type="checkbox"/>     | <input type="checkbox"/> | <input type="checkbox"/> |
| 4. How difficult is it for you to climb stairs?                                                                                                   | <input type="checkbox"/>     | <input type="checkbox"/>   | <input type="checkbox"/>     | <input type="checkbox"/> | <input type="checkbox"/> |
| 5. How difficult is it for you to make a tight fist?                                                                                              | <input type="checkbox"/>     | <input type="checkbox"/>   | <input type="checkbox"/>     | <input type="checkbox"/> | <input type="checkbox"/> |
| 6. How difficult is it for you to get in or out of the bathtub or shower?                                                                         | <input type="checkbox"/>     | <input type="checkbox"/>   | <input type="checkbox"/>     | <input type="checkbox"/> | <input type="checkbox"/> |
| 7. How difficult is it for you to get comfortable to sleep?                                                                                       | <input type="checkbox"/>     | <input type="checkbox"/>   | <input type="checkbox"/>     | <input type="checkbox"/> | <input type="checkbox"/> |
| 8. How difficult is it for you to bend or kneel down?                                                                                             | <input type="checkbox"/>     | <input type="checkbox"/>   | <input type="checkbox"/>     | <input type="checkbox"/> | <input type="checkbox"/> |
| 9. How difficult is it for you to use buttons, snaps, hooks, or zippers?                                                                          | <input type="checkbox"/>     | <input type="checkbox"/>   | <input type="checkbox"/>     | <input type="checkbox"/> | <input type="checkbox"/> |
| 10. How difficult is it for you to cut your own fingernails?                                                                                      | <input type="checkbox"/>     | <input type="checkbox"/>   | <input type="checkbox"/>     | <input type="checkbox"/> | <input type="checkbox"/> |
| 11. How difficult is it for you to dress yourself?                                                                                                | <input type="checkbox"/>     | <input type="checkbox"/>   | <input type="checkbox"/>     | <input type="checkbox"/> | <input type="checkbox"/> |
| 12. How difficult is it for you to walk?                                                                                                          | <input type="checkbox"/>     | <input type="checkbox"/>   | <input type="checkbox"/>     | <input type="checkbox"/> | <input type="checkbox"/> |
| 13. How difficult is it for you to get moving after you have been sitting or lying down?                                                          | <input type="checkbox"/>     | <input type="checkbox"/>   | <input type="checkbox"/>     | <input type="checkbox"/> | <input type="checkbox"/> |
| 14. How difficult is it for you to go out by yourself?                                                                                            | <input type="checkbox"/>     | <input type="checkbox"/>   | <input type="checkbox"/>     | <input type="checkbox"/> | <input type="checkbox"/> |
| 15. How difficult is it for you to drive?                                                                                                         | <input type="checkbox"/>     | <input type="checkbox"/>   | <input type="checkbox"/>     | <input type="checkbox"/> | <input type="checkbox"/> |
| 16. How difficult is it for you to clean yourself after going to the bathroom?                                                                    | <input type="checkbox"/>     | <input type="checkbox"/>   | <input type="checkbox"/>     | <input type="checkbox"/> | <input type="checkbox"/> |
| 17. How difficult is it for you to turn knobs or levers (for example, to open doors or to roll down car windows)?                                 | <input type="checkbox"/>     | <input type="checkbox"/>   | <input type="checkbox"/>     | <input type="checkbox"/> | <input type="checkbox"/> |
| 18. How difficult is it for to write or type?                                                                                                     | <input type="checkbox"/>     | <input type="checkbox"/>   | <input type="checkbox"/>     | <input type="checkbox"/> | <input type="checkbox"/> |
| 19. How difficult is it for you to pivot?                                                                                                         | <input type="checkbox"/>     | <input type="checkbox"/>   | <input type="checkbox"/>     | <input type="checkbox"/> | <input type="checkbox"/> |
| 20. How difficult is it for you to do your usual physical recreational activities, such as bicycling, jogging, or walking?                        | <input type="checkbox"/>     | <input type="checkbox"/>   | <input type="checkbox"/>     | <input type="checkbox"/> | <input type="checkbox"/> |
| 21. How difficult is it for you to do your usual leisure activities, such as hobbies, crafts, gardening, card-playing, or going out with friends? | <input type="checkbox"/>     | <input type="checkbox"/>   | <input type="checkbox"/>     | <input type="checkbox"/> | <input type="checkbox"/> |
| 22. How much difficulty are you having with sexual activity?                                                                                      | <input type="checkbox"/>     | <input type="checkbox"/>   | <input type="checkbox"/>     | <input type="checkbox"/> | <input type="checkbox"/> |
| 23. How difficult is it for you to do light housework or yard work, such as dusting, washing dishes, or watering plants?                          | <input type="checkbox"/>     | <input type="checkbox"/>   | <input type="checkbox"/>     | <input type="checkbox"/> | <input type="checkbox"/> |
| 24. How difficult is it for you to do heavy housework or yard work, such as washing floors, vacuuming, or mowing lawns?                           | <input type="checkbox"/>     | <input type="checkbox"/>   | <input type="checkbox"/>     | <input type="checkbox"/> | <input type="checkbox"/> |
| 25. How difficult is it for you to do your usual work, such as a paid job, housework, or volunteer activities?                                    | <input type="checkbox"/>     | <input type="checkbox"/>   | <input type="checkbox"/>     | <input type="checkbox"/> | <input type="checkbox"/> |

**These next questions ask how often you are experiencing problems this week because of your injury or arthritis.**

|                                                                                                                                    | None of<br>the Time<br>A | A Little of<br>the Time<br>B | Some of<br>the Time<br>C | Most of<br>the Time<br>D | All of<br>the Time<br>E  |
|------------------------------------------------------------------------------------------------------------------------------------|--------------------------|------------------------------|--------------------------|--------------------------|--------------------------|
| 26. How often do you walk with a limp?                                                                                             | <input type="checkbox"/> | <input type="checkbox"/>     | <input type="checkbox"/> | <input type="checkbox"/> | <input type="checkbox"/> |
| 27. How often do you avoid using your painful limb(s) or back?                                                                     | <input type="checkbox"/> | <input type="checkbox"/>     | <input type="checkbox"/> | <input type="checkbox"/> | <input type="checkbox"/> |
| 28. How often does your leg lock or give way?                                                                                      | <input type="checkbox"/> | <input type="checkbox"/>     | <input type="checkbox"/> | <input type="checkbox"/> | <input type="checkbox"/> |
| 29. How often do you have problems with concentrating?                                                                             | <input type="checkbox"/> | <input type="checkbox"/>     | <input type="checkbox"/> | <input type="checkbox"/> | <input type="checkbox"/> |
| 30. How often does doing too much in one way affect what you do the next day?                                                      | <input type="checkbox"/> | <input type="checkbox"/>     | <input type="checkbox"/> | <input type="checkbox"/> | <input type="checkbox"/> |
| 31. How often do you act irritable toward those around you (for example, snap at people, give sharp answers, or criticize easily)? | <input type="checkbox"/> | <input type="checkbox"/>     | <input type="checkbox"/> | <input type="checkbox"/> | <input type="checkbox"/> |
| 32. How often are you tired?                                                                                                       | <input type="checkbox"/> | <input type="checkbox"/>     | <input type="checkbox"/> | <input type="checkbox"/> | <input type="checkbox"/> |
| 33. How often do you feel disabled?                                                                                                | <input type="checkbox"/> | <input type="checkbox"/>     | <input type="checkbox"/> | <input type="checkbox"/> | <input type="checkbox"/> |
| 34. How often do you feel angry or frustrated that you have this injury or arthritis?                                              | <input type="checkbox"/> | <input type="checkbox"/>     | <input type="checkbox"/> | <input type="checkbox"/> | <input type="checkbox"/> |

**These questions are about how much you are bothered by problems you are having this week because of your injury or arthritis.**

|                                                                                                              | Not at All<br>Bothered<br>A | A Little<br>Bothered<br>B | Moderately<br>Bothered<br>C | Very<br>Bothered<br>D    | Extremely<br>Bothered<br>E |
|--------------------------------------------------------------------------------------------------------------|-----------------------------|---------------------------|-----------------------------|--------------------------|----------------------------|
| 35. How much are you bothered by problems using your hands, arms, or legs?                                   | <input type="checkbox"/>    | <input type="checkbox"/>  | <input type="checkbox"/>    | <input type="checkbox"/> | <input type="checkbox"/>   |
| 36. How much are you bothered by problems with your back?                                                    | <input type="checkbox"/>    | <input type="checkbox"/>  | <input type="checkbox"/>    | <input type="checkbox"/> | <input type="checkbox"/>   |
| 37. How much are you bothered by problems doing work around your home?                                       | <input type="checkbox"/>    | <input type="checkbox"/>  | <input type="checkbox"/>    | <input type="checkbox"/> | <input type="checkbox"/>   |
| 38. How much are you bothered by problems with bathing, dressing, toileting, or other personal care?         | <input type="checkbox"/>    | <input type="checkbox"/>  | <input type="checkbox"/>    | <input type="checkbox"/> | <input type="checkbox"/>   |
| 39. How much are you bothered by problems with sleep and rest?                                               | <input type="checkbox"/>    | <input type="checkbox"/>  | <input type="checkbox"/>    | <input type="checkbox"/> | <input type="checkbox"/>   |
| 40. How much are you bothered by problems with leisure or recreational activities?                           | <input type="checkbox"/>    | <input type="checkbox"/>  | <input type="checkbox"/>    | <input type="checkbox"/> | <input type="checkbox"/>   |
| 41. How much are you bothered by problems with your friends, family, or other important people in your life? | <input type="checkbox"/>    | <input type="checkbox"/>  | <input type="checkbox"/>    | <input type="checkbox"/> | <input type="checkbox"/>   |
| 42. How much are you bothered by problems with thinking, concentrating, or remembering?                      | <input type="checkbox"/>    | <input type="checkbox"/>  | <input type="checkbox"/>    | <input type="checkbox"/> | <input type="checkbox"/>   |
| 43. How much are you bothered by problems adjusting or coping with your injury or arthritis?                 | <input type="checkbox"/>    | <input type="checkbox"/>  | <input type="checkbox"/>    | <input type="checkbox"/> | <input type="checkbox"/>   |
| 44. How much are you bothered by problems doing your usual work?                                             | <input type="checkbox"/>    | <input type="checkbox"/>  | <input type="checkbox"/>    | <input type="checkbox"/> | <input type="checkbox"/>   |
| 45. How much are you bothered with feeling dependent on others?                                              | <input type="checkbox"/>    | <input type="checkbox"/>  | <input type="checkbox"/>    | <input type="checkbox"/> | <input type="checkbox"/>   |
| 46. How much are you bothered with stiffness and pain?                                                       | <input type="checkbox"/>    | <input type="checkbox"/>  | <input type="checkbox"/>    | <input type="checkbox"/> | <input type="checkbox"/>   |
