# Supplementary material for: Pelvic ring injury in the elderly: Fragile patients with substantial mortality rates and long-term physical impairment
Source: PubMed Central journal article supplement (PMC6538139; doi:10.1371/journal.pone.0216809), 2019-05-28
Supplement: pone.0216809.s004.pdf [file pone.0216809.s004.pdf]

Zet bij iedere groep in de lijst hieronder een kruisje in het hokje voor de zin die het best past bij uw eigen gezondheidstoestand vandaag.

### **Mobiliteit**

- Ik heb geen problemen met lopen
- Ik heb een beetje problemen met lopen
- Ik heb matige problemen met lopen
- Ik heb ernstige problemen met lopen
- Ik ben niet in staat om te lopen

### **Zelfzorg**

- Ik heb geen problemen om mijzelf te wassen of aan te kleden
- Ik heb een beetje problemen om mijzelf te wassen of aan te kleden
- Ik heb matige problemen om mijzelf te wassen of aan te kleden
- Ik heb ernstige problemen om mijzelf te wassen of aan te kleden
- Ik ben niet in staat mijzelf te wassen of aan te kleden

### **Dagelijkse activiteiten (bijv. Werk, studie, huishouden, gezins- en vrijetijdsactiviteiten)**

- Ik heb geen problemen met mijn dagelijkse activiteiten
- Ik heb een beetje problemen met mijn dagelijkse activiteiten
- Ik heb matige problemen met mijn dagelijkse activiteiten
- Ik heb ernstige problemen met mijn dagelijkse activiteiten
- Ik ben niet in staat mijn dagelijkse activiteiten uit te voeren

### **Pijn/ongemak**

- Ik heb geen pijn of ongemak
- Ik heb een beetje pijn of ongemak
- Ik heb matige pijn of ongemak
- Ik heb ernstige pijn of ongemak
- Ik heb extreme pijn of ongemak

### **Stemming**

- Ik ben niet angstig of somber
- Ik ben een beetje angstig of somber
- Ik ben matig angstig of somber
- Ik ben erg angstig of somber
- Ik ben extreem angstig of somber
